# Supplementary material for: Prevalence and Correlates of Cannabis Use and Cannabis Use Disorder Among U.S. Veterans: Results From the National Epidemiologic Survey on Alcohol and Related Conditions (NESARC-III)
Source: Atypon-hosted journal article supplement (doi:10.1176/appi.ajp.2021.20081202), 2021-08-19
Supplement: appi.ajp.2021.20081202.ds001.pdf [file appi.ajp.2021.20081202.ds001.pdf]

Data supplement for Browne et al., Prevalence and Correlates of Cannabis Use and Cannabis Use Disorder in U.S. Veterans: Results From the National Epidemiologic Survey on Alcohol and Related Conditions (NESARC-III). Am J Psychiatry (doi: 10.1176/appi.ajp.2021.20081202)

**TABLE S1. Prevalence and adjusted odds ratios of lifetime non-medical cannabis use and lifetime cannabis use disorder: Relationship to demographic characteristics**

| Characteristic                             | Lifetime Non-Medical Cannabis Use |                 |                 |            | Lifetime Cannabis Use Disorder |                 |                 |             |
|--------------------------------------------|-----------------------------------|-----------------|-----------------|------------|--------------------------------|-----------------|-----------------|-------------|
|                                            | % <sup>a</sup>                    | SE <sup>a</sup> | OR <sup>b</sup> | 95% CI     | % <sup>a</sup>                 | SE <sup>a</sup> | OR <sup>b</sup> | 95% CI      |
| <b>Sex</b>                                 |                                   |                 |                 |            |                                |                 |                 |             |
| Male                                       | 32.5                              | 1.18            | <b>1.54</b>     | 1.13, 2.09 | 5.87                           | 0.59            | <b>2.26</b>     | 1.19, 4.29  |
| Female                                     | 32.1                              | 2.95            | Reference       |            | 4.02                           | 1.01            | Reference       |             |
| <b>Age</b>                                 |                                   |                 |                 |            |                                |                 |                 |             |
| 18-29                                      | 50.78                             | 4.30            | <b>5.01</b>     | 3.13, 8.02 | 12.96                          | 3.66            | <b>11.75</b>    | 3.95, 34.95 |
| 30-34                                      | 46.42                             | 2.92            | <b>4.80</b>     | 3.25, 7.11 | 10.63                          | 1.54            | <b>11.68</b>    | 5.82, 23.41 |
| 45-64                                      | 44.59                             | 1.80            | <b>4.27</b>     | 3.29, 5.56 | 7.80                           | 0.96            | <b>7.11</b>     | 3.83, 13.21 |
| ≥65                                        | 15.12                             | 1.16            | Reference       |            | 1.42                           | 0.38            | Reference       |             |
| <b>Race/ethnicity</b>                      |                                   |                 |                 |            |                                |                 |                 |             |
| Black                                      | 43.55                             | 2.94            | 1.10            | 0.84, 1.43 | 6.81                           | 1.49            | 0.75            | 0.48, 1.16  |
| Hispanic                                   | 39.86                             | 4.00            | 1.04            | 0.74, 1.48 | 4.02                           | 1.36            | 0.44            | 0.21, 0.94  |
| White                                      | 29.85                             | 1.18            | Reference       |            | 5.29                           | 0.51            | Reference       |             |
| Other                                      | 44.82                             | 5.00            | 1.30            | 0.80, 2.12 | 14.27                          | 3.93            | <b>2.08</b>     | 1.09, 3.97  |
| <b>Education</b>                           |                                   |                 |                 |            |                                |                 |                 |             |
| <High school                               | 22.49                             | 2.95            | 0.80            | 0.56, 1.14 | 4.92                           | 1.73            | <b>1.36</b>     | 0.59, 3.11  |
| High school                                | 33.14                             | 2.16            | 1.01            | 0.83, 1.24 | 7.10                           | 1.29            | <b>1.27</b>     | 0.82, 1.96  |
| Some college                               | 33.10                             | 1.23            | Reference       |            | 5.22                           | 0.54            | Reference       |             |
| <b>Marital status</b>                      |                                   |                 |                 |            |                                |                 |                 |             |
| Married                                    | 28.46                             | 1.40            | Reference       |            | 4.17                           | 0.49            | Reference       |             |
| Widowed, separated, or divorced            | 38.25                             | 1.98            | <b>1.53</b>     | 1.21, 1.94 | 8.21                           | 1.17            | <b>1.94</b>     | 1.29, 2.89  |
| Not married                                | 49.41                             | 3.02            | <b>1.46</b>     | 1.09, 1.95 | 11.05                          | 1.93            | <b>1.55</b>     | 0.93, 2.59  |
| <b>Employment</b>                          |                                   |                 |                 |            |                                |                 |                 |             |
| Employed full-time                         | 42.63                             | 1.98            | Reference       |            | 7.82                           | 0.89            | Reference       |             |
| Employed part-time                         | 34.85                             | 3.47            | 0.98            | 0.65, 1.48 | 4.30                           | 1.09            | 0.61            | 0.32, 1.14  |
| Unemployed                                 | 44.77                             | 5.70            | 0.81            | 0.50, 1.30 | 8.51                           | 2.58            | 0.76            | 0.39, 1.49  |
| Other (e.g., retired, in school, disabled) | 24.47                             | 1.29            | 0.87            | 0.66, 1.13 | 4.28                           | 0.57            | <b>1.06</b>     | 0.72, 1.57  |
| <b>Income</b>                              |                                   |                 |                 |            |                                |                 |                 |             |
| 0-19,999                                   | 41.28                             | 2.39            | <b>1.56</b>     | 1.12, 2.19 | 7.43                           | 1.16            | <b>2.10</b>     | 1.09, 4.03  |
| 20,000–34,999                              | 32.01                             | 2.76            | 1.17            | 0.83, 1.64 | 7.63                           | 1.37            | <b>2.51</b>     | 1.38, 4.55  |
| 35,000–69,999                              | 30.07                             | 1.82            | 1.02            | 0.78, 1.34 | 6.43                           | 0.99            | <b>2.13</b>     | 1.21, 3.77  |
| ≥70,000                                    | 30.77                             | 2.09            | Reference       |            | 3.07                           | 0.64            | Reference       |             |
| <b>Urbanicity</b>                          |                                   |                 |                 |            |                                |                 |                 |             |
| Urban                                      | 33.05                             | 1.29            | 1.03            | 0.80, 1.32 | 5.94                           | 0.61            | <b>1.23</b>     | 0.78, 1.96  |
| Rural                                      | 30.68                             | 1.97            | Reference       |            | 4.92                           | 0.86            | Reference       |             |
| <b>Region</b>                              |                                   |                 |                 |            |                                |                 |                 |             |
| Northeast                                  | 35.39                             | 2.96            | 1.05            | 0.73, 1.50 | 6.34                           | 1.48            | 1.02            | 0.56, 1.84  |
| Midwest                                    | 29.60                             | 2.75            | 0.72            | 0.51, 1.00 | 6.08                           | 0.51            | 0.84            | 0.56, 1.25  |
| South                                      | 30.88                             | 1.50            | 0.69            | 0.52, 0.90 | 4.55                           | 0.84            | 0.60            | 0.36, 1.00  |
| West                                       | 36.30                             | 2.39            | Reference       |            | 6.94                           | 1.25            | Reference       |             |

<sup>a</sup> Based on weighted data.

<sup>b</sup> Odds ratios adjusted for sex, age, race/ethnicity, education, marital status, employment status, family income, and urbanicity.

**TABLE S2. Prevalence and adjusted odds ratios of lifetime non-medical cannabis use and lifetime cannabis use disorder: Relationship to lifetime psychiatric and other substance use disorders**

| Disorder, lifetime               | Lifetime Non-Medical Cannabis Use |      |                 |             | Lifetime Cannabis Use Disorder |      |                 |             |
|----------------------------------|-----------------------------------|------|-----------------|-------------|--------------------------------|------|-----------------|-------------|
|                                  | % <sup>a</sup>                    | SE   | OR <sup>b</sup> | 95% CI      | % <sup>a</sup>                 | SE   | OR <sup>b</sup> | 95% CI      |
| Alcohol use disorder             |                                   |      |                 |             |                                |      |                 |             |
| Yes                              | 50.24                             | 2.19 | <b>2.84</b>     | 2.26, 3.58  | 12.85                          | 1.24 | <b>5.79</b>     | 3.89, 8.62  |
| No                               | 23.03                             | 1.13 | Reference       |             | 1.89                           | 0.29 | Reference       |             |
| Opioid Use Disorder <sup>c</sup> |                                   |      |                 |             |                                |      |                 |             |
| Yes                              | 70.72                             | 8.33 | <b>4.63</b>     | 1.99, 10.75 | 33.70                          | 7.62 | <b>7.48</b>     | 3.38, 16.55 |
| No                               | 31.78                             | 1.08 | Reference       |             | 5.19                           | 0.47 | Reference       |             |
| Drug Use Disorder <sup>d</sup>   |                                   |      |                 |             |                                |      |                 |             |
| Yes                              | 83.98                             | 4.38 | <b>8.96</b>     | 4.97, 16.16 | 33.28                          | 4.05 | <b>7.58</b>     | 4.74, 12.14 |
| No                               | 29.96                             | 1.10 | Reference       |             | 4.35                           | 0.50 | Reference       |             |
| Tobacco use disorder             |                                   |      |                 |             |                                |      |                 |             |
| Yes                              | 49.08                             | 1.89 | <b>2.98</b>     | 2.41, 3.70  | 11.37                          | 1.03 | <b>3.74</b>     | 2.40, 5.82  |
| No                               | 22.96                             | 1.21 | Reference       |             | 2.44                           | 0.44 | Reference       |             |
| Any mood disorder                |                                   |      |                 |             |                                |      |                 |             |
| Yes                              | 48.81                             | 2.54 | <b>1.83</b>     | 1.43, 2.34  | 15.60                          | 1.97 | <b>3.95</b>     | 2.66, 5.88  |
| No                               | 28.61                             | 1.14 | Reference       |             | 3.36                           | 0.38 | Reference       |             |
| Any anxiety disorder             |                                   |      |                 |             |                                |      |                 |             |
| Yes                              | 44.11                             | 2.72 | <b>1.62</b>     | 1.27, 2.08  | 13.95                          | 2.23 | <b>3.27</b>     | 2.11, 5.08  |
| No                               | 30.57                             | 1.15 | Reference       |             | 4.35                           | 0.42 | Reference       |             |
| Any personality disorder         |                                   |      |                 |             |                                |      |                 |             |
| Yes                              | 50.93                             | 2.95 | <b>2.19</b>     | 1.70, 2.83  | 17.07                          | 1.97 | <b>4.58</b>     | 3.27, 6.41  |
| No                               | 28.67                             | 1.11 | Reference       |             | 3.35                           | 0.37 | Reference       |             |
| PTSD                             |                                   |      |                 |             |                                |      |                 |             |
| Yes                              | 46.63                             | 4.10 | <b>1.45</b>     | 1.04, 2.01  | 16.25                          | 2.66 | <b>2.82</b>     | 1.78, 4.48  |
| No                               | 31.40                             | 1.12 | Reference       |             | 4.90                           | 0.53 | Reference       |             |

<sup>a</sup> Based on weighted data.

<sup>b</sup> Odds ratios adjusted for sex, age, race/ethnicity, education, marital status, employment status, family income, and urbanicity.

<sup>c</sup> Related to non-medical use of prescription opioids.

<sup>d</sup> Excluding cannabis use disorder and opioid use disorder.
